# Supplementary material for: A simple thermometer-based photothermometric assay for alkaline phosphatase activity based on target-induced nanoprobe generation
Source: Royal Society of Chemistry journal article supplement (doi:10.1039/d0nj03920a), 2020-01-01
Supplement: d0nj03920a1.pdf [file d0nj03920a1.pdf]

## Supporting Information

### **A simple thermometer based photothermometric assay for alkaline phosphatase activity based on target-induced nanoprobe generation**

Honghong Rao,<sup>\*a</sup> Huiyi Huang,<sup>a,b</sup> Xinyuan Zhang,<sup>a,b</sup> Xin Xue,<sup>b</sup> Mingyue Luo,<sup>b</sup> Haixia Liu<sup>a</sup> and Zhonghua Xue<sup>\*b</sup>

---

<sup>a</sup>. *College of Chemistry and Chemical Engineering, Lanzhou City University, Lanzhou, 730070, China.*

<sup>b</sup>. *College of Chemistry and Chemical Engineering, Northwest Normal University, Lanzhou 730070, China*

*\* Corresponding authors:*

*Tel/Fax: +86 931 7970520*

*E-mail: xzh@nwnu.edu.cn; rhh@nwnu.edu.cn*

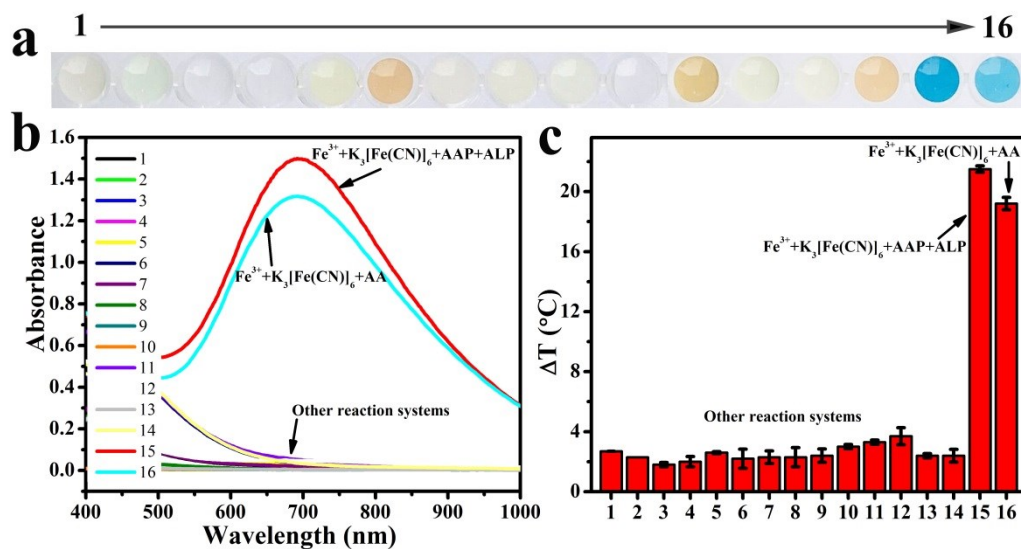

**Fig. S1.** (a) Photographs, (b) UV-vis absorption spectra and (c) temperature changes ( $\Delta T$ ) of the ALP-induced in situ PB NPs generation system with different components. The final concentrations of  $\text{Fe}^{3+}$ ,  $\text{K}_3[\text{Fe}(\text{CN})_6]$ , AAP, ALP and AA are 0.5 mM, 0.25 mM, 0.5 mM, 10 U/L, and 75  $\mu\text{M}$ , respectively (1:  $\text{Fe}^{3+}$ , 2:  $\text{K}_3[\text{Fe}(\text{CN})_6]$ , 3: AAP, 4: ALP, 5:  $\text{Fe}^{3+} + \text{K}_3[\text{Fe}(\text{CN})_6]$ , 6:  $\text{Fe}^{3+} + \text{AAP}$ , 7:  $\text{Fe}^{3+} + \text{ALP}$ , 8:  $\text{K}_3[\text{Fe}(\text{CN})_6] + \text{AAP}$ , 9:  $\text{K}_3[\text{Fe}(\text{CN})_6] + \text{ALP}$ , 10: AAP+ALP, 11:  $\text{Fe}^{3+} + \text{K}_3[\text{Fe}(\text{CN})_6] + \text{AAP}$ , 12:  $\text{Fe}^{3+} + \text{K}_3[\text{Fe}(\text{CN})_6] + \text{ALP}$ , 13:  $\text{K}_3[\text{Fe}(\text{CN})_6] + \text{AAP} + \text{ALP}$ , 14:  $\text{Fe}^{3+} + \text{AAP} + \text{ALP}$ , 15:  $\text{Fe}^{3+} + \text{K}_3[\text{Fe}(\text{CN})_6] + \text{AAP} + \text{ALP}$ , 16:  $\text{Fe}^{3+} + \text{K}_3[\text{Fe}(\text{CN})_6] + \text{AA}$ ). Error bars indicate standard deviations ( $n=3$ ).

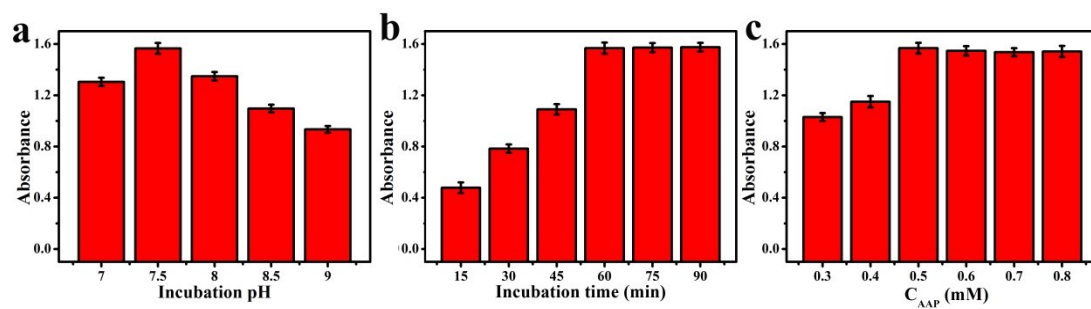

**Fig. S2.** Optimization of the reaction condition for enzymatic incubation. (a) The incubation pH of enzyme. (b) The incubation time of enzyme. (c) Concentration of AAP. The final concentrations of  $Fe^{3+}$ ,  $K_3[Fe(CN)_6]$  and ALP are 0.5 mM, 0.25 mM, and 10 U/L, respectively.

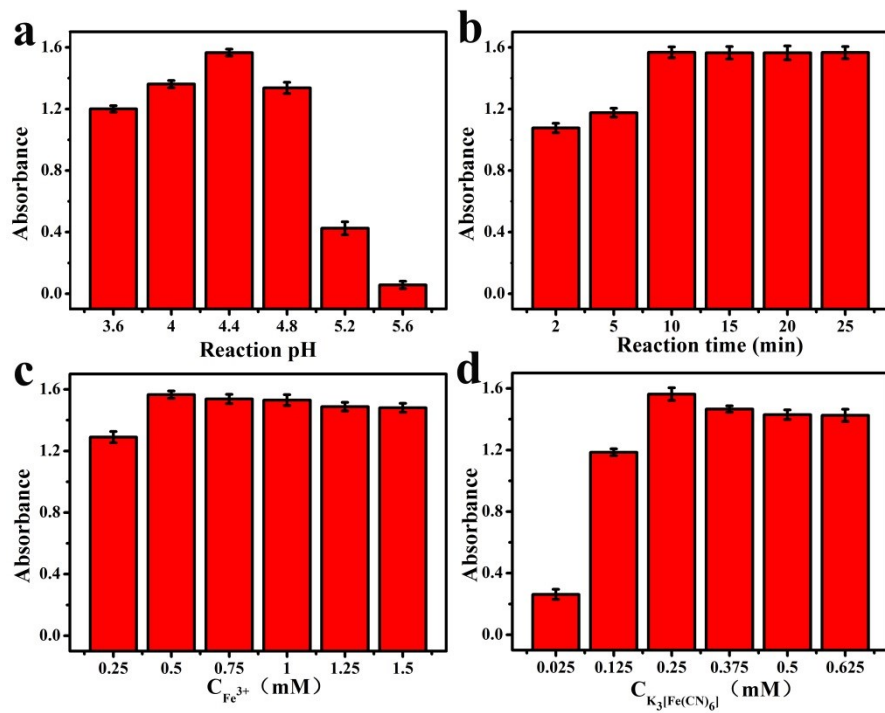

**Fig. S3.** Optimization of the reaction condition. (a) Reaction pH. (b) Reaction time. (c)  $Fe^{3+}$  concentration. (d)  $K_3[Fe(CN)_6]$  concentration. The final concentrations of AAP and ALP are 0.5 mM and 10 U/L, respectively.

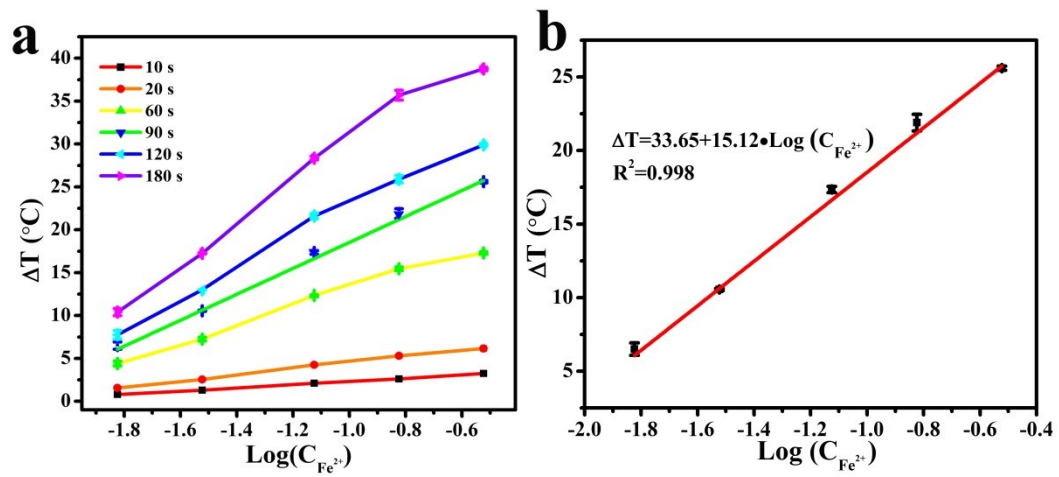

**Fig. S4.** (a) The line chart of the relationship between  $Fe^{2+}$  concentrations (0.015-0.3mM) and the temperature increment ( $\Delta T$ ) of the colorimetric reaction system with different irradiation time (10-180 s). (b) Calibration plot of the temperature changes ( $\Delta T$ ) of the reaction solutions at 90 s vs the logarithm of the  $Fe^{2+}$  concentration.

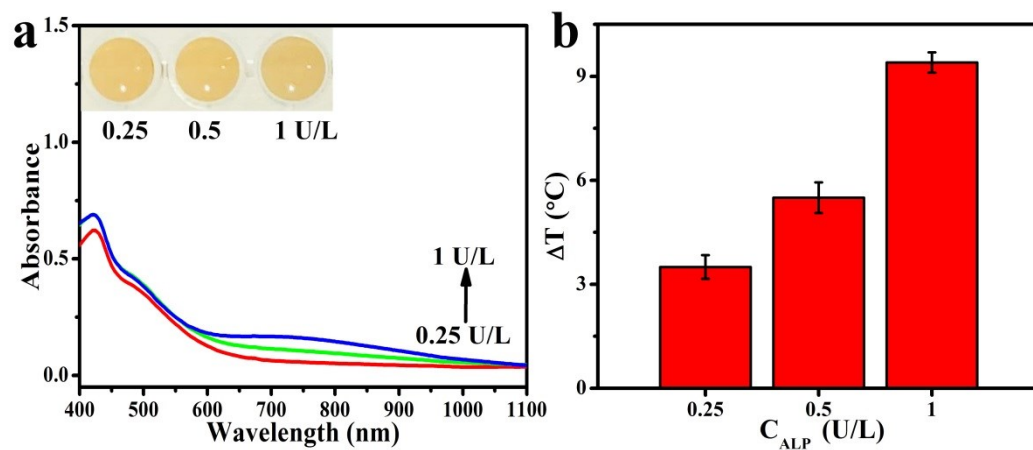

**Fig. S5.** (a) UV-vis absorption spectra and (b) temperature changes of the reaction solution system with the addition of 0.25 U/L, 0.5 U/L and 1 U/L ALP. Inset: photographs of the corresponding solution.

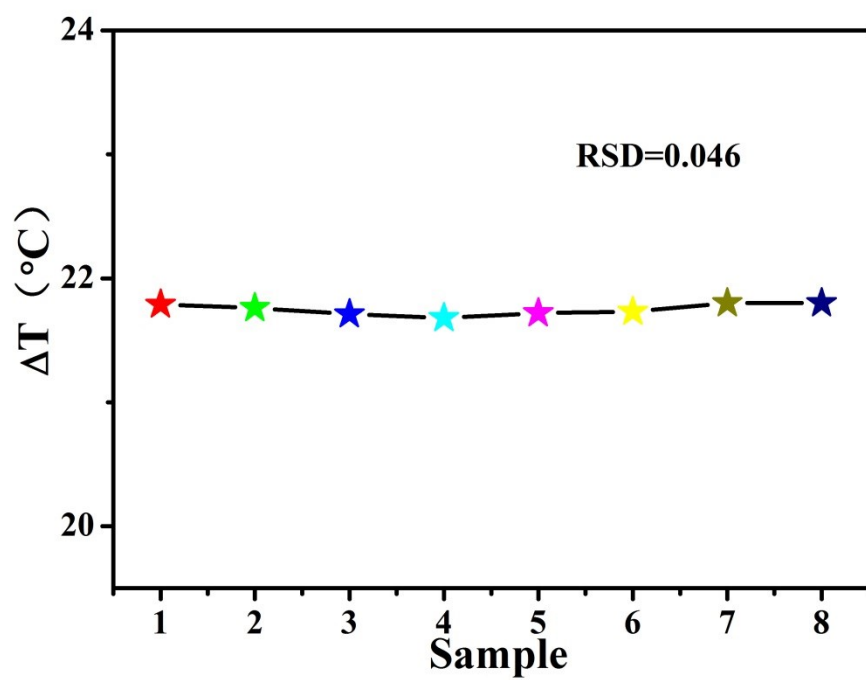

**Fig. S6.** Temperature changes of the reaction solution system for eight sample solutions with the same ALP concentration (10 U/L).

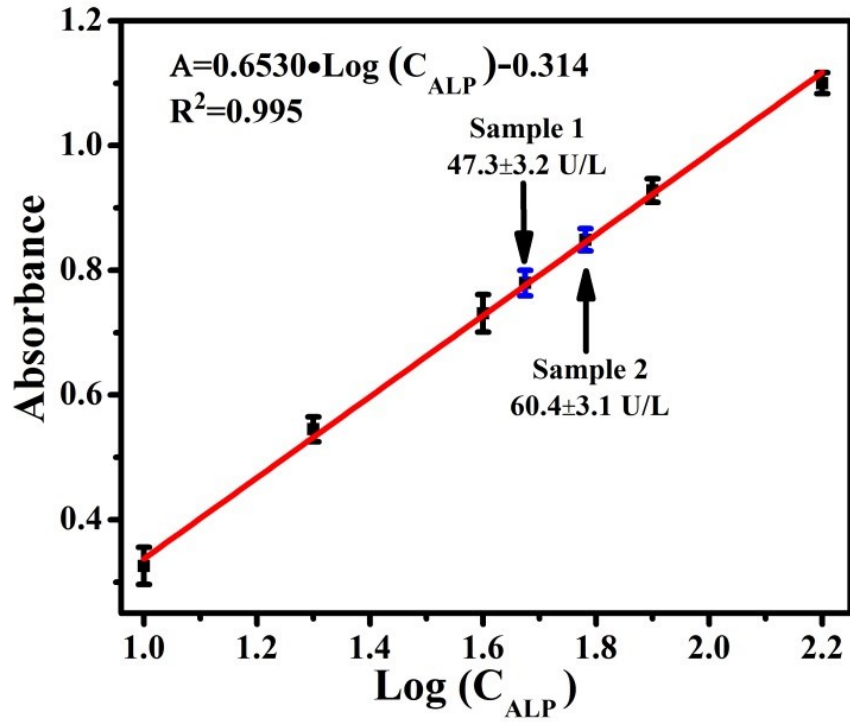

**Fig. S7.** The calculated result of the PNPP-based standard method. (The absorbance at 405 nm was linearly correlated with the logarithm of the ALP concentration with the square of the correlation coefficient of 0.995 ( $A=0.6530 \cdot \text{Log}(C_{\text{ALP}})-0.314$ ). And then, the measured absorbance of the serum samples was brought into the regression equation. The serum sample concentrations were calculated as 47.3 U/L, 60.4 U/L, respectively.)
